# Supplementary material
Source: PubMed Central journal article supplement (PMC4867851)
Supplement: rhpr_a_947547_sm5168.pdf [file rhpr_a_947547_sm5168.pdf]

Supplementary Table 1. Papers excluded after reading full-text articles, with reasons for exclusion

| Author names                         | Reason for exclusion                                                                                               |
|--------------------------------------|--------------------------------------------------------------------------------------------------------------------|
| Caballero et al. (2007)              | Duplicate data                                                                                                     |
| Carrera et al. (2012)                | Atypical measures of TPB constructs (e.g., used unipolar measures with only one scale endpoint for attitudes)      |
| Collins & Carey (2007)               | Correlations not reported                                                                                          |
| Collins et al. (2010)                | Correlations not reported                                                                                          |
| Conner & Flesch (2001)               | No measure of alcohol intentions reported                                                                          |
| Conner et al. (1999)                 | No measure of alcohol intentions reported                                                                          |
| Huchting et al. (2008)               | Atypical measures of TPB constructs (e.g., Rutgers Alcohol Problem Index used to measure PBC)                      |
| Kam et al. (2009)                    | No measure of alcohol intentions reported                                                                          |
| Kuther & Higgins-D'Alessandro (2003) | No measure of alcohol intentions reported                                                                          |
| Lac et al. (2013)                    | Correlations not reported                                                                                          |
| Marcoux & Shope (1997)               | Correlations not reported                                                                                          |
| McMillan & Conner (2003)             | Atypical measures of TPB constructs (e.g., PBC assessed using belief-based measures as opposed to direct measures) |
| Murgraff et al. (2001)               | No measure of alcohol intentions reported                                                                          |
| Norman et al. (1998)                 | No measure of alcohol intentions reported                                                                          |
| Rivis et al. (2006)                  | Correlations not reported                                                                                          |
| Zimmerman & Sieverding (2011)        | Duplicate data                                                                                                     |

Supplementary Table 2. Definitions of alcohol consumption reported in included studies

| <b>Authors &amp; Year</b>  | <b>Behaviour</b>                                                                                                                            | <b>Category</b> |
|----------------------------|---------------------------------------------------------------------------------------------------------------------------------------------|-----------------|
| Ajzen & Sheikh (2013)      | Drink alcohol                                                                                                                               | -               |
|                            | Avoid alcohol                                                                                                                               | Not drinking    |
| Armitage et al. (2002)     | Very drunk at least twice in the next week                                                                                                  | Getting drunk   |
| Conner et al. (1999)       |                                                                                                                                             |                 |
| Study 1                    | Drink alcohol in the next two weeks                                                                                                         | -               |
| Study 2                    | Drink alcohol in the next two weeks                                                                                                         | -               |
| Study 3                    | Drink alcohol next Sunday                                                                                                                   | -               |
| Cooke & French (2011)      |                                                                                                                                             |                 |
| Bar Sample                 | Females consuming > 7 units, males consuming > 10.5 units of alcohol in a single session                                                    | Heavy Episodic  |
| Library Sample             | Females consuming > 7 units, males consuming > 10.5 units of alcohol in a single session                                                    | Heavy Episodic  |
| Cooke et al. (2007)        | Females consuming > 7 units, males consuming > 10.5 units of alcohol in a single session                                                    | Heavy Episodic  |
| Elliott & Ainsworth (2012) | Females consuming > 6 units, males consuming > 8 units of alcohol in a single session                                                       | Light Episodic  |
| French & Cooke (2012)      | Females consuming > 7 units, males consuming > 10.5 units of alcohol in a single session                                                    | Heavy Episodic  |
| Gagnon et al. (2012)       | NIAAA (2004) guidelines > 3 drinks for females and > 4 drinks for males                                                                     | Light Episodic  |
| Gardner et al. (2012)      | Eight units for females and males                                                                                                           | Heavy Episodic  |
| Glassman et al. (2010)     | Extreme Ritualistic Alcohol Consumption (ERAC): $\geq 10$ drinks for males, or $\geq 8$ for females on game day                             | Heavy Episodic  |
| Hagger et al. (2007)       | Females consuming > 7 units, males consuming > 10.5 units of alcohol in a single session                                                    | Heavy Episodic  |
| Hagger et al. (2012a)      | NIAAA (2004) guidelines > 3 drinks for females and > 4 drinks for males                                                                     | Light Episodic  |
| Hagger et al. (2012b)      | NIAAA (2004) guidelines > 3 drinks for females and > 4 drinks for males                                                                     | Light Episodic  |
| Jamison & Myers (2008)     | Females = 4 or more pints of beer/glasses of wine/measures of spirits. Males = 5 or more pints of beer/glasses of wine/measures of spirits. | Quantity drunk  |
| Johnston & White (2003)    | Five or more standard Australian drinks                                                                                                     | Light Episodic  |
| Kim & Hong (2013)          | Controlled drinking                                                                                                                         | -               |
| Norman (2011)              | Females consuming > 6 units, males consuming > 8 units of alcohol in a single session                                                       | Light Episodic  |
| Norman & Conner (2006)     | Females consuming > 7 units, males consuming > 10.5 units of alcohol in a single session                                                    | Heavy Episodic  |
| Norman et al. (2007)       | Females consuming > 7 units, males consuming > 10.5 units of alcohol in a single session                                                    | Heavy Episodic  |

|                                |                                                                                          |                |
|--------------------------------|------------------------------------------------------------------------------------------|----------------|
| Norman et al. (2012)           | Females consuming > 7 units, males consuming > 10.5 units of alcohol in a single session | Heavy Episodic |
| O'Callaghan et al. (1997)      | Drink alcohol in the next month                                                          | -              |
| Park et al. (2009)             | Moderate drinking = 4 drinks or less                                                     | Light Episodic |
| Rise & Wilhelmsen (1998)       |                                                                                          |                |
| Grade 7 Boys                   | Not drink alcohol at the next house party                                                | Not drinking   |
| Grade 7 Girls                  | Not drink alcohol at the next house party                                                | Not drinking   |
| Grade 9 Boys                   | Not drink alcohol at the next house party                                                | Not drinking   |
| Grade 9 Girls                  | Not drink alcohol at the next house party                                                | Not drinking   |
| Spijkerman et al. (2004)       | Drink alcohol                                                                            | -              |
| Todd & Mullan (2011)           | NHMRC (2009) guidelines = 5 or more standard drinks                                      | Light Episodic |
| Wall et al. (1998)             |                                                                                          |                |
| Men                            | Too much to drink                                                                        | Getting drunk  |
| Women                          | Too much to drink                                                                        | Getting drunk  |
| Woolfson & Maguire (2010)      | Females consuming > 7 units, males consuming > 10.5 units of alcohol in a single session | Heavy Episodic |
| Zimmermann & Sieverding (2010) |                                                                                          |                |
| Men                            | Drinking > 3 glasses of alcohol                                                          | Quantity drunk |
| Women                          | Drinking > 3 glasses of alcohol                                                          | Quantity drunk |

Notes.

Getting drunk = getting very drunk, heavy drinking

Heavy episodic = drinking more than 56g ethanol in a single session

Light episodic = drinking less than 56g ethanol in a single session

Quantity drunk = quantity of drinks consumed

Not drinking = avoiding alcohol consumption

Supplementary Table 3: Summary of included studies

| Authors & Year                       | Country                  | % F             | Mean Age | Behaviour <sup>a</sup> | N            | A   | SN               | PBC              | SE  | PC   | N   | I   | PBC  | SE  | PC   |
|--------------------------------------|--------------------------|-----------------|----------|------------------------|--------------|-----|------------------|------------------|-----|------|-----|-----|------|-----|------|
| Ajzen & Sheikh (2013)                | USA                      | 73 <sup>b</sup> | -        | Drink alcohol          | 49           | .68 | .51              | .48              | -   | -    | -   | -   | -    | -   | -    |
|                                      | USA                      | 73 <sup>b</sup> | -        | Not drinking           | 49           | .50 | .27              | .30              | -   | -    | -   | -   | -    | -   | -    |
| Armitage et al. (2002)               | UK                       | 51              | 26       | Getting drunk          | 124          | .61 | .47              | -                | .53 | -    | -   | -   | -    | -   | -    |
| Conner et al. (1999)                 |                          |                 |          |                        |              |     |                  |                  |     |      |     |     |      |     |      |
| Study 1                              | UK                       | 53              | -        | Drink alcohol          | 178          | .39 | .34              | .44              | -   | -    | 155 | .48 | .59  | -   | -    |
| Study 2                              | UK                       | 57              | -        | Drink alcohol          | 176          | .39 | .23              | -.35             | -   | -    | 111 | .35 | -.62 | -   | -    |
| Study 3                              | UK                       | 74              | -        | Drink alcohol          | 159          | .48 | .51              | -.24             | -   | -    | 159 | .35 | -.21 | -   | -    |
| Cooke & French (2011)                |                          |                 |          |                        |              |     |                  |                  |     |      |     |     |      |     |      |
| Bar Sample                           | UK                       | 50              | -        | Heavy Episodic         | 195          | .52 | .52 <sup>c</sup> | .40              | -   | -    | -   | -   | -    | -   | -    |
| Library Sample                       | UK                       | 50              | -        | Heavy Episodic         | 188          | .62 | .55 <sup>c</sup> | .48              | -   | -    | -   | -   | -    | -   | -    |
| Cooke et al. (2007)                  | UK                       | 58              | 20.28    | Heavy Episodic         | 178          | .58 | .20 <sup>c</sup> | .34              | -   | -    | -   | -   | -    | -   | -    |
| Elliott & Ainsworth (2012)           | UK                       | 69              | 20.40    | Light Episodic         | 120          | .78 | .50              | -                | .75 | -.15 | 120 | .70 |      | .58 | -.11 |
| French & Cooke (2012)                | UK                       | 50              | -        | Heavy Episodic         | 197          | .66 | .42 <sup>c</sup> | .14 <sup>c</sup> | -   | -    | 177 | .57 | .01  | -   | -    |
| Gagnon et al. (2012)                 | Canada                   | 58              | 20.10    | Light Episodic         | 141          | .67 | .48              | -                | .64 | -    | -   | -   | -    | -   | -    |
| Gardner et al. (2012)                | UK                       | 70              | 21.95    | Heavy Episodic         | 167          | .72 | .47              | -                | .56 | -    | -   | -   | -    | -   | -    |
| Glassman et al. (2010)               | USA                      | 61              | -        | Heavy Episodic         | <sup>d</sup> | .85 | .66              | -                | -   | .07  | -   | -   | -    | -   | -    |
| Hagger et al. (2007)                 | UK                       | 57              | 22.83    | Heavy Episodic         | 525          | .81 | .71              | .75              | -   | -    | 525 | .61 | .53  | -   | -    |
| Hagger, Lonsdale, Hein et al. (2012) |                          |                 |          |                        |              |     |                  |                  |     |      |     |     |      |     |      |
| Time 1                               | 4 countries <sup>e</sup> | 54              | 30.41    | Light Episodic         | 486          | .74 | .45              | .65              | -   | -    | -   | -   | -    | -   | -    |
| Time 2                               | 4 countries <sup>e</sup> | 54              | 30.41    | Light Episodic         | 486          | .77 | .52              | .54              | -   | -    | -   | -   | -    | -   | -    |
| Hagger, Lonsdale, Koka et al. (2012) |                          |                 |          |                        |              |     |                  |                  |     |      |     |     |      |     |      |
|                                      | Estonia                  | 68              | 20.94    | Light Episodic         | 185          | .75 | .52              | .58              | -   | -    | -   | -   | -    | -   | -    |
|                                      | Finland                  | 63              | 23.40    | Light Episodic         | 119          | .82 | .75              | .40              | -   | -    | -   | -   | -    | -   | -    |
|                                      | UK                       | 87              | 19.77    | Light Episodic         | 163          | .67 | .52              | .52              | -   | -    | -   | -   | -    | -   | -    |

|                                |             |                 |                    |                  |              |     |      |      |      |      |     |     |      |     |      |
|--------------------------------|-------------|-----------------|--------------------|------------------|--------------|-----|------|------|------|------|-----|-----|------|-----|------|
| Jamison & Myers (2008)         | UK          | 42              | 23                 | Quantity drunk   | 176          | .33 | .27  | .19  | -    | -    | 176 | .33 | .24  | -   | -    |
| Johnston & White (2003)        | Australia   | 80              | 26                 | Light Episodic   | 289          | .75 | .72  | -    | .74  | -    | 223 | .69 | -    | .59 | -    |
| Kim & Hong (2013)              | Korea       | 0               | 37.10              | Controlled drink | 315          | .36 | .54  | .51  | -    | -    | -   | -   | -    | -   | -    |
| Norman (2011)                  | UK          | 82              | 19.12              | Light Episodic   | 137          | .82 | .44  | -    | .64  | .02  | 109 | .59 |      | .37 | -.05 |
| Norman & Conner (2006)         | UK          | 77              | 20.26              | Heavy Episodic   | 398          | .83 | .43  | -    | .70  | -.22 | 273 | .48 |      | .42 | -.12 |
| Norman et al. (2007)           | UK          | 86              | 20.08              | Heavy Episodic   | 94           | .74 | .42  | -    | .29  | -.01 | 79  | .40 | -    | .26 | -.19 |
| Norman et al. (2012)           | UK          | 83              | 20.38              | Heavy Episodic   | 172          | .84 | .46  | .37  | -    | -    | 172 | .46 | .33  | -   | -    |
| O'Callaghan et al. (1997)      | Australia   | 67              | -                  | Drink alcohol    | 122          | .40 | .44  | .21  | -    | -    | 122 | .63 | .33  | -   | -    |
| Park et al. (2009)             | USA         | 54              | 20.60              | Light Episodic   | <sup>t</sup> | .48 | .61  | -    | .43  | -    | -   | -   | -    | -   | -    |
| Rise & Wilhelmsen (1998)       |             |                 |                    |                  |              |     |      |      |      |      |     |     |      |     |      |
| Grade 7 Boys                   | Norway      |                 | 13.6 <sup>b</sup>  | Not drinking     | 430          | .33 | .45  | -    | .36  | -    | -   | -   | -    | -   | -    |
| Grade 7 Girls                  | Norway      | 50              | 13.6 <sup>b</sup>  | Not drinking     | 430          | .40 | .50  | -    | .42  | -    | -   | -   | -    | -   | -    |
| Grade 9 Boys                   | Norway      |                 | 15.7 <sup>b</sup>  | Not drinking     | 434          | .30 | .44  | -    | .34  | -    | -   | -   | -    | -   | -    |
| Grade 9 Girls                  | Norway      | 49              | 15.7 <sup>b</sup>  | Not drinking     | 434          | .33 | .48  | -    | .46  | -    | -   | -   | -    | -   | -    |
| Spijkerman et al. (2004)       | Netherlands | 52              | 12.90              | Drink alcohol    | 2814         | .61 | .55  | -    | -.49 | -    | -   | -   | -    | -   | -    |
| Todd & Mullan (2011)           | Australia   | 100             | 19                 | Light Episodic   | 80           | .59 | .63  | .54  | -    | -    | 80  | .63 | .43  | -   | -    |
| Wall et al. (1998)             |             |                 |                    |                  |              |     |      |      |      |      |     |     |      |     |      |
| Men                            | Canada      |                 | 19.91 <sup>b</sup> | Getting drunk    | 170          | .58 | -.13 | -.46 | -    | -    | 170 | .55 | -.37 | -   | -    |
| Women                          | Canada      | 46 <sup>b</sup> | 19.91 <sup>b</sup> | Getting drunk    | 146          | .52 | .01  | -.45 | -    | -    | 146 | .53 | -.42 | -   | -    |
| Woolfson & Maguire (2010)      | UK          | 77              | 21                 | Heavy Episodic   | 62           | .81 | .27  | -    | .35  | -.37 | 62  | .52 | -    | .20 | -.30 |
| Zimmermann & Sieverding (2010) |             |                 |                    |                  |              |     |      |      |      |      |     |     |      |     |      |
| Men                            | Germany     |                 | 24.7 <sup>b</sup>  | Quantity drunk   | 153          | .45 | .23  | -    | .53  | -    | 153 | .56 | -    | .26 | -    |
| Women                          | Germany     | 49 <sup>a</sup> | 24.7 <sup>b</sup>  | Quantity drunk   | 147          | .35 | .34  | -    | .44  | -    | 147 | .60 | -    | .45 | -    |

Notes.

<sup>a</sup> Full definitions are provided in Supplementary Appendix 1

<sup>b</sup> Overall sample statistics

<sup>c</sup> Average correlation computed

<sup>d</sup> Samples sizes for Glassman et al.: Attitude-intention N = 218, SN-Intention N = 221, PBC-Intention = 219

<sup>e</sup> Four countries = Estonia, Finland, Sweden and UK

<sup>f</sup> Samples sizes for Park et al.: Attitude-intention N = 947, SN-Intention N = 940, PBC-Intention = 948
