# Supplementary material
Source: PubMed Central journal article supplement (PMC4867851)
Supplement: rhpr_a_947547_sm6058.pdf [file rhpr_a_947547_sm6058.pdf]

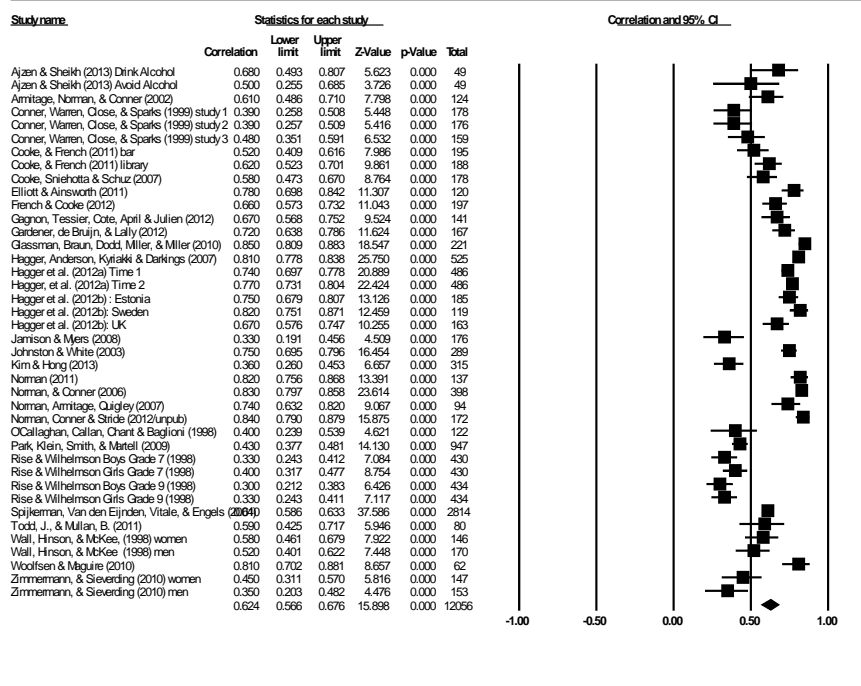

Supplementary Figure 1. Forest plot of effect sizes for the Attitude-Intention Relationship

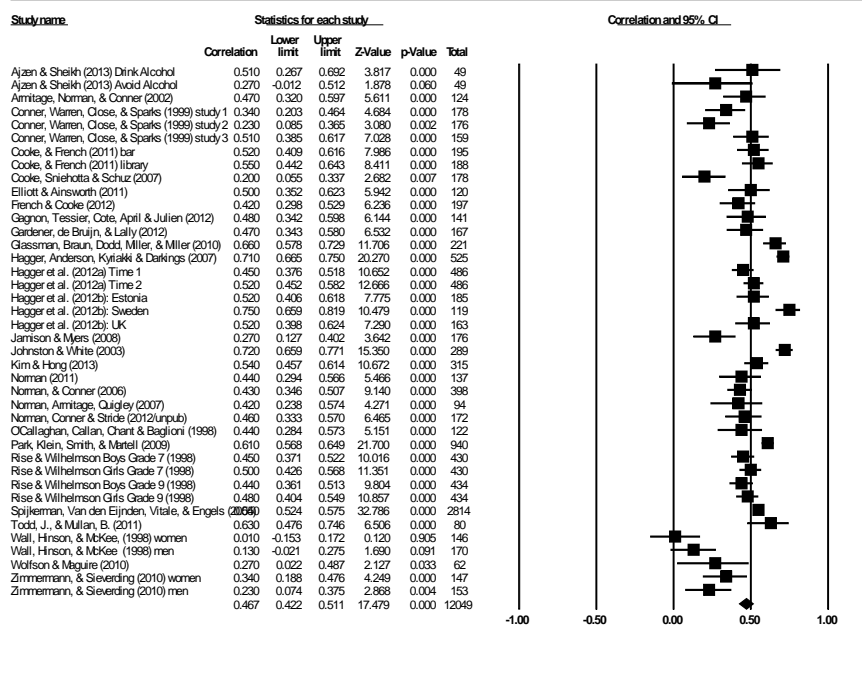

Supplementary Figure 2. Forest plot of effect sizes for the Subjective norm-Intention relationship

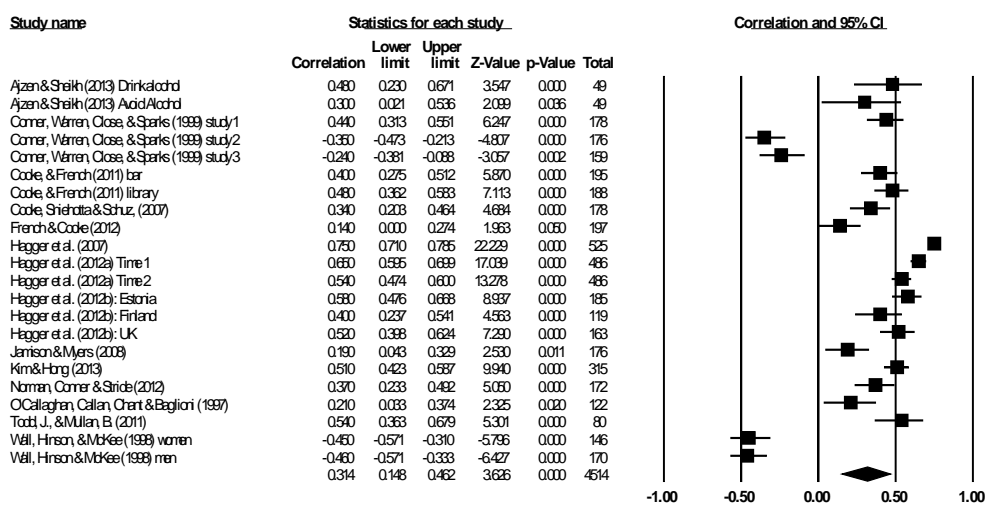

Supplementary Figure 3. Forest plot of effect sizes for the PBC-Intention relationship

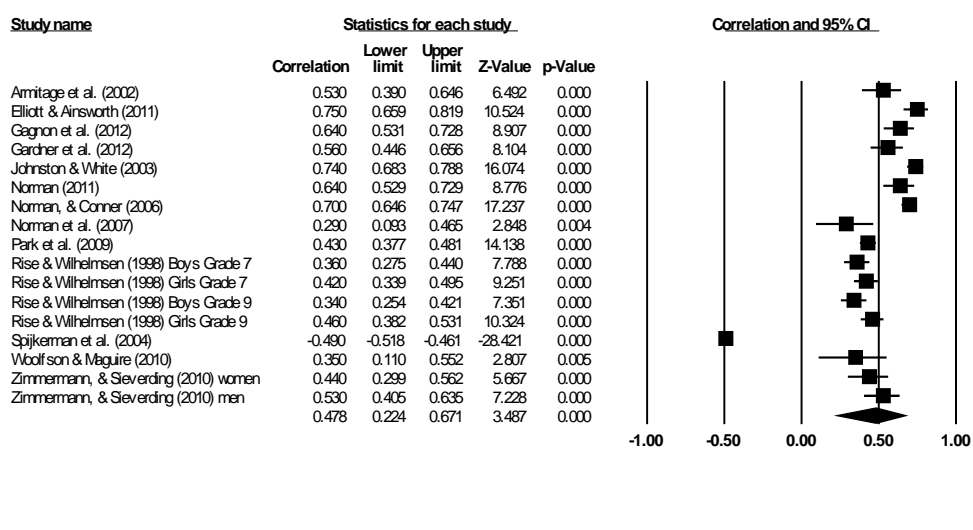

Supplementary Figure 4. Forest plot of effect sizes for the SE-Intention relationship

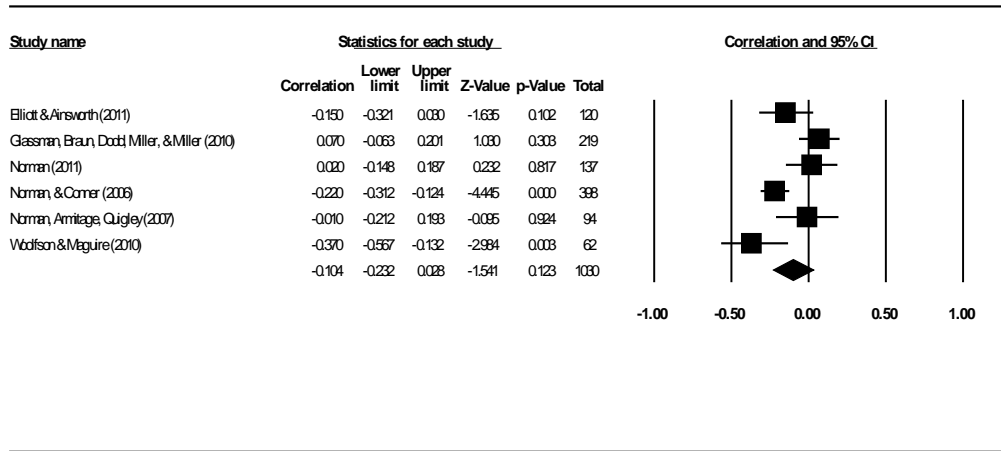

Supplementary Figure 5. Forest plot of effect sizes for the PC-Intention relationship

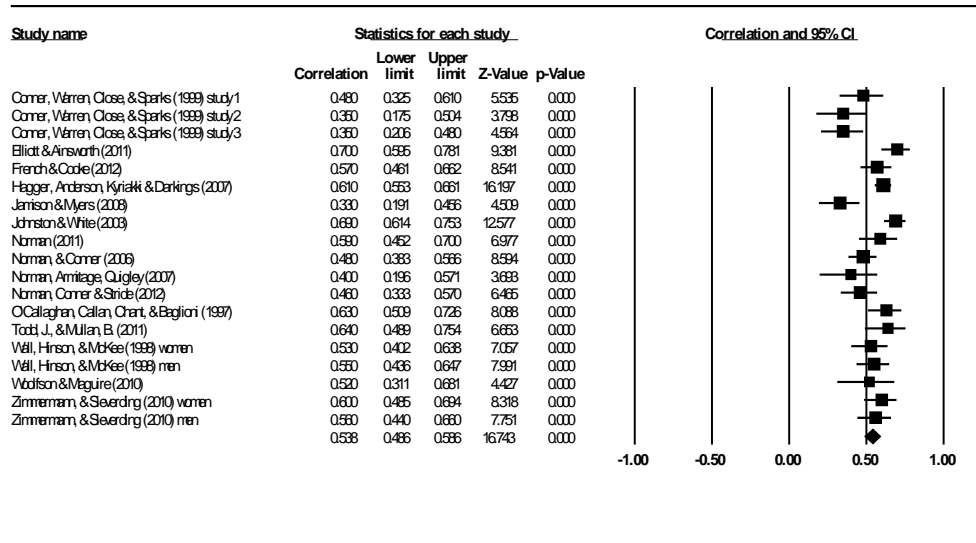

Supplementary Figure 6. Forest plot of effect sizes for the Intention-Behaviour relationship

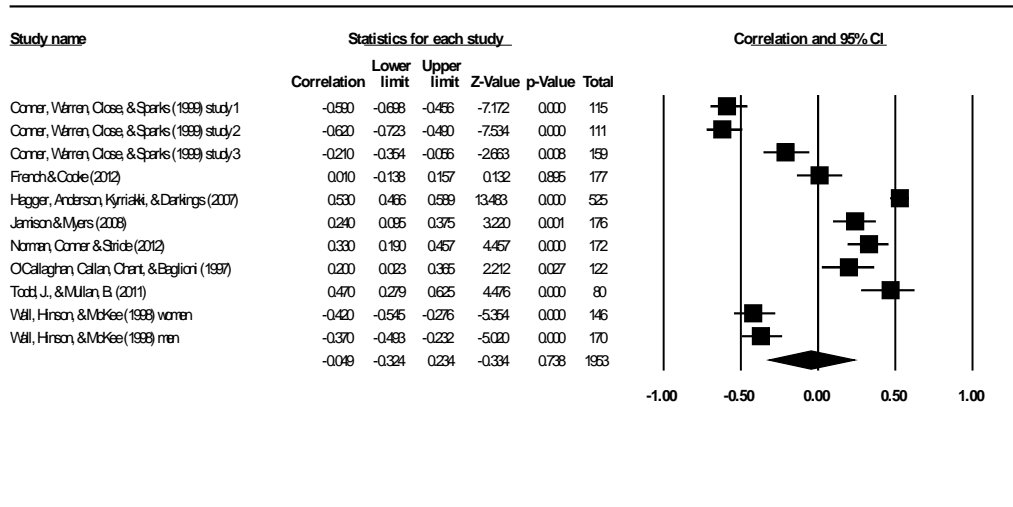

Supplementary Figure 7. Forest plot of effect sizes for the PBC-Behaviour relationship

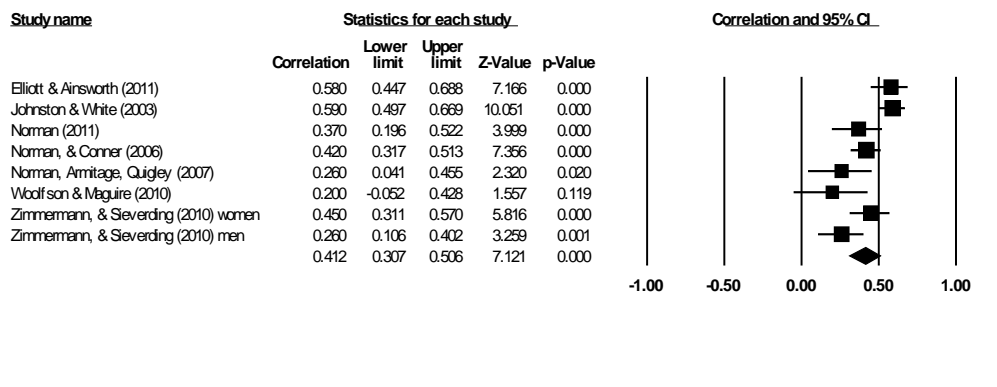

Supplementary Figure 8. Forest plot of effect sizes for the SE-Behaviour relationship



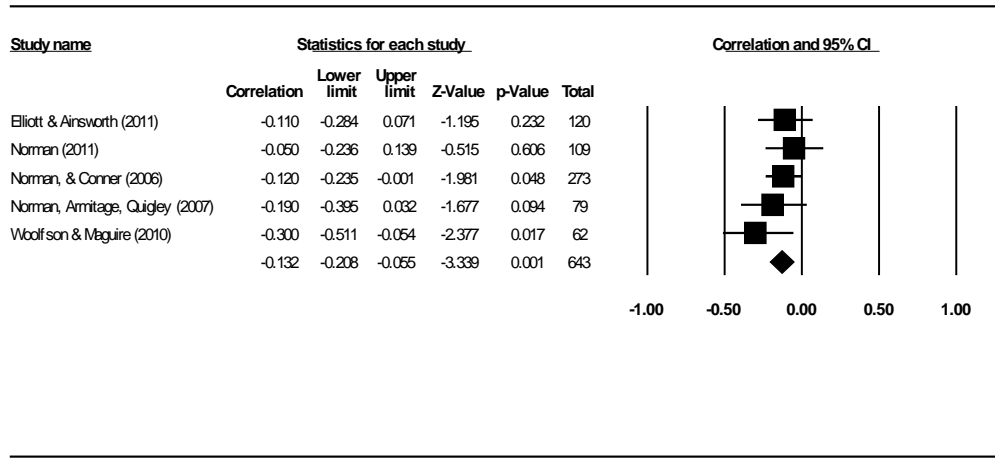

Supplementary Figure 9. Forest plot of effect sizes for the PC-Behaviour relationship

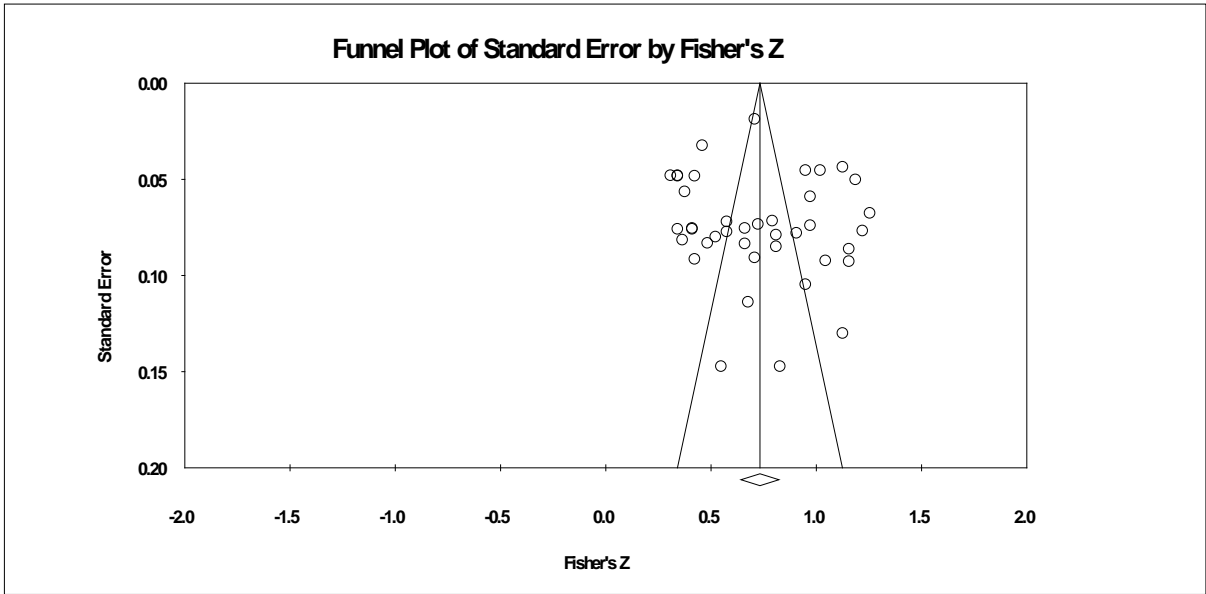

Supplementary Figure 10. Funnel plot of effect sizes for the Attitude-Intention relationship

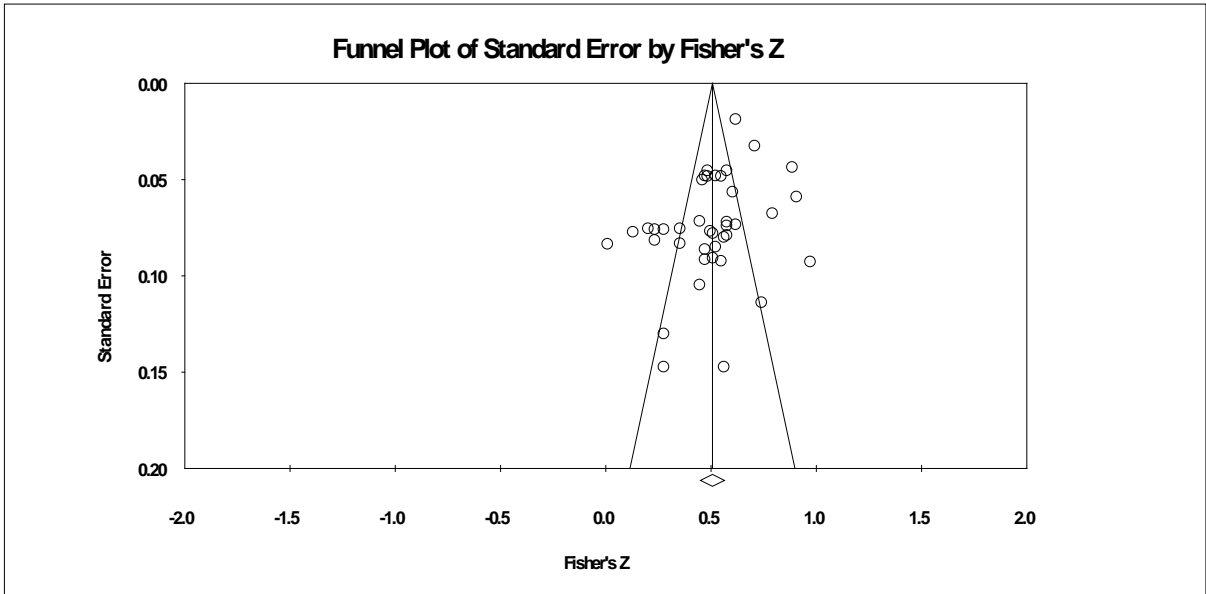

Supplementary Figure 11. Funnel plot of effect sizes for the Subjective norm-Intention relationship

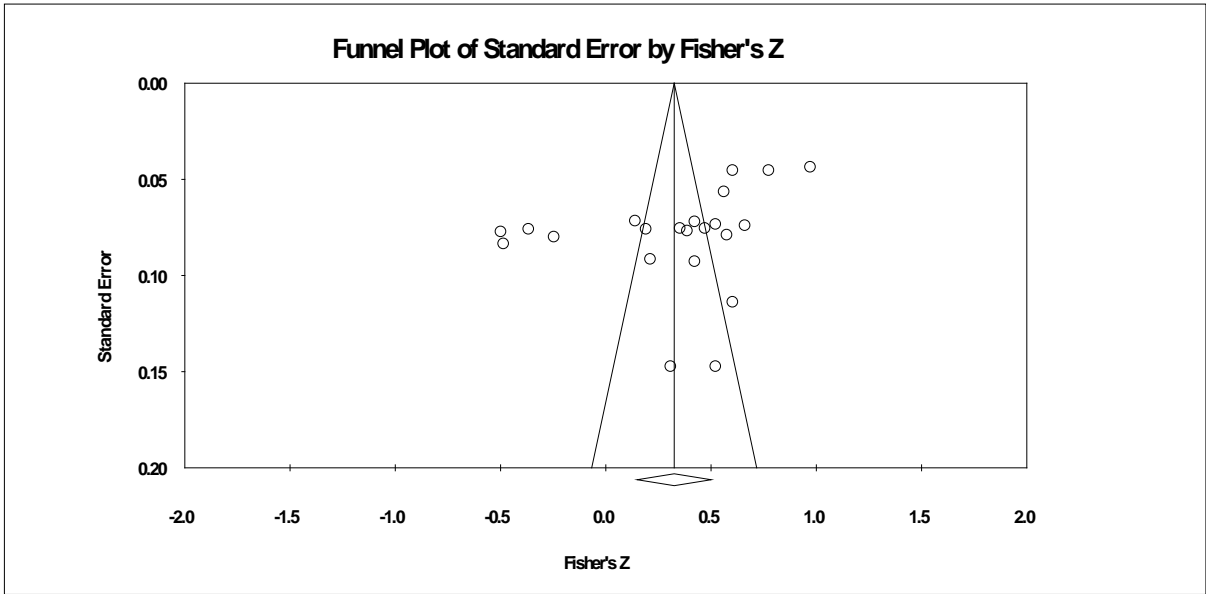

Supplementary Figure 12. Funnel plot of effect sizes for the PBC-Intention relationship

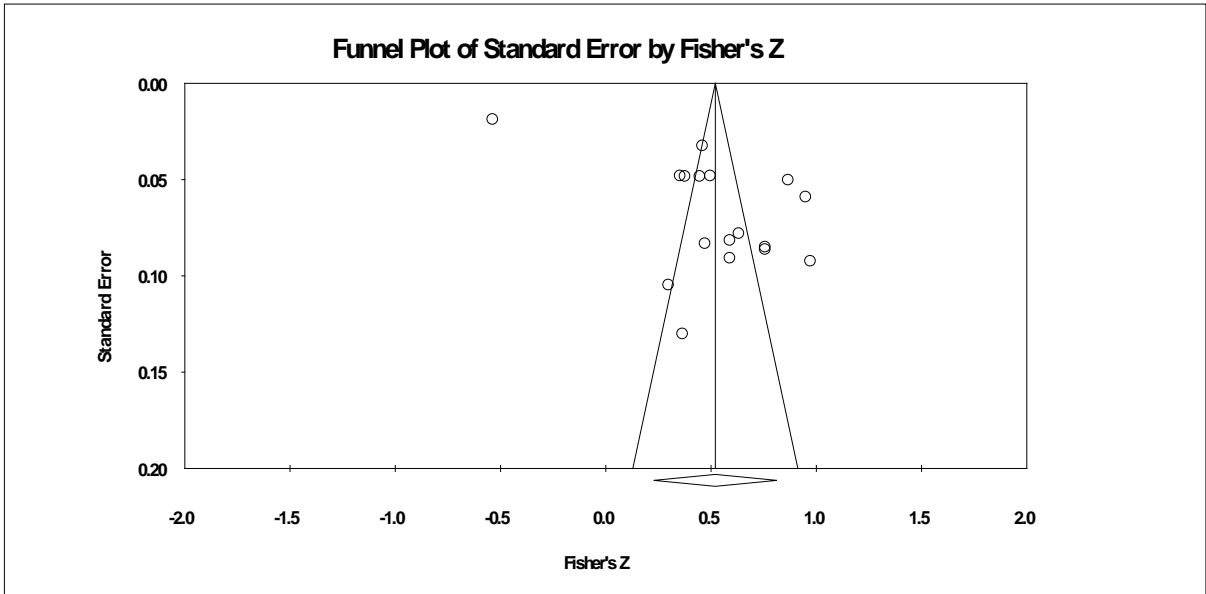

Supplementary Figure 13. Funnel plot of effect sizes for the SE-Intention relationship

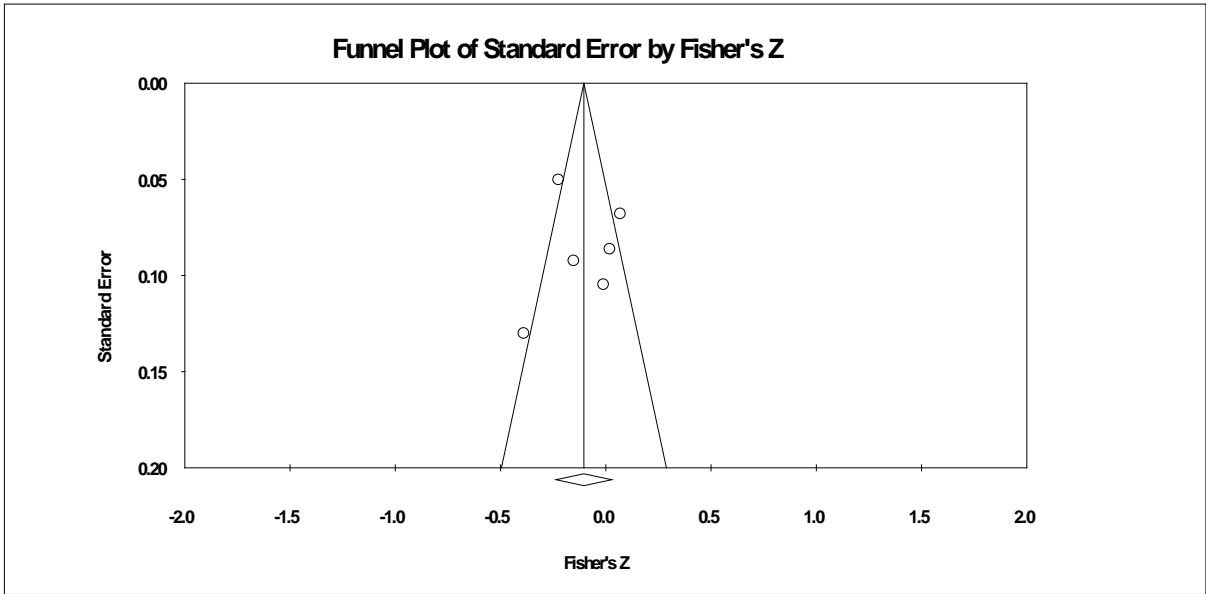

Supplementary Figure 14. Funnel plot of effect sizes for the PC-Intention relationship

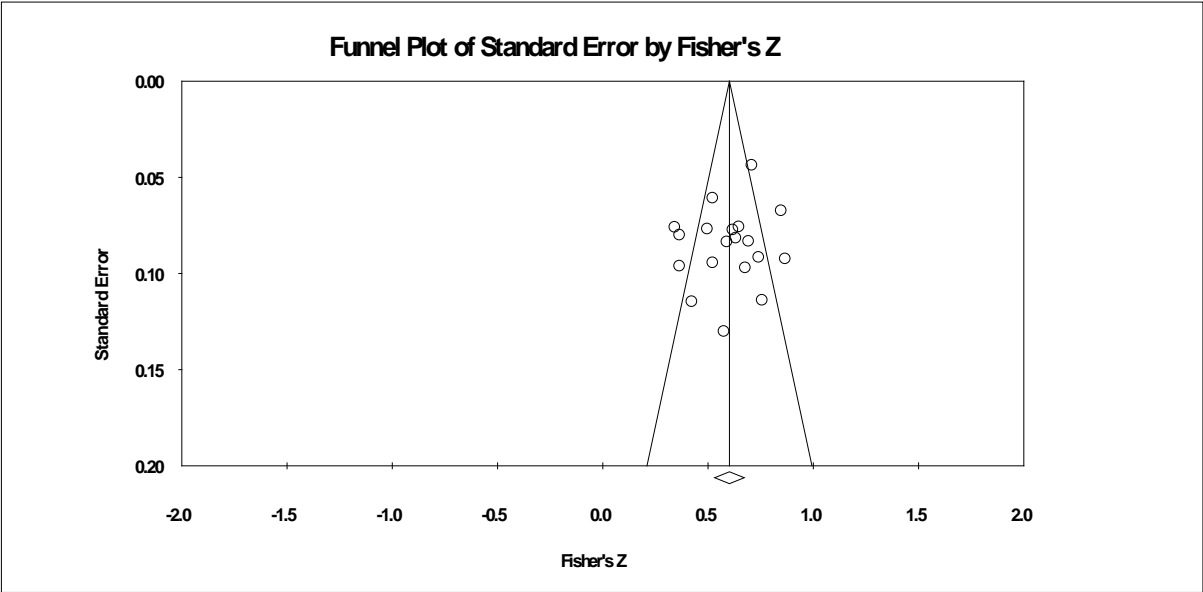

Supplementary Figure 15. Funnel plot of effect sizes for the Intention-Behaviour relationship

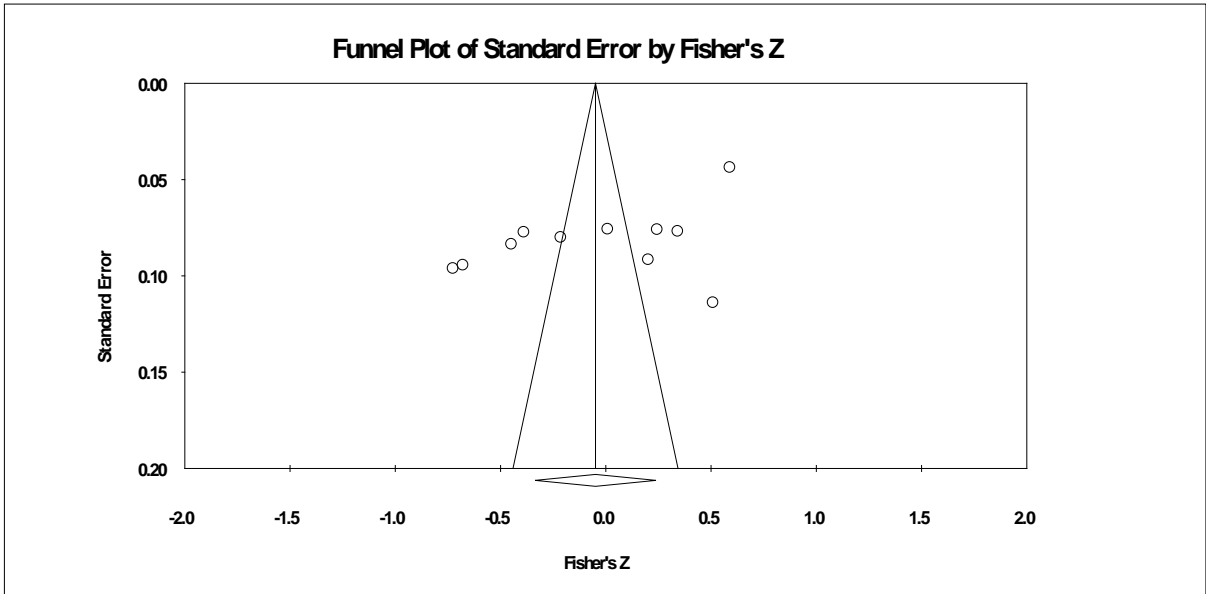

Supplementary Figure 16. Funnel plot of effect sizes for the PBC-Behaviour relationship



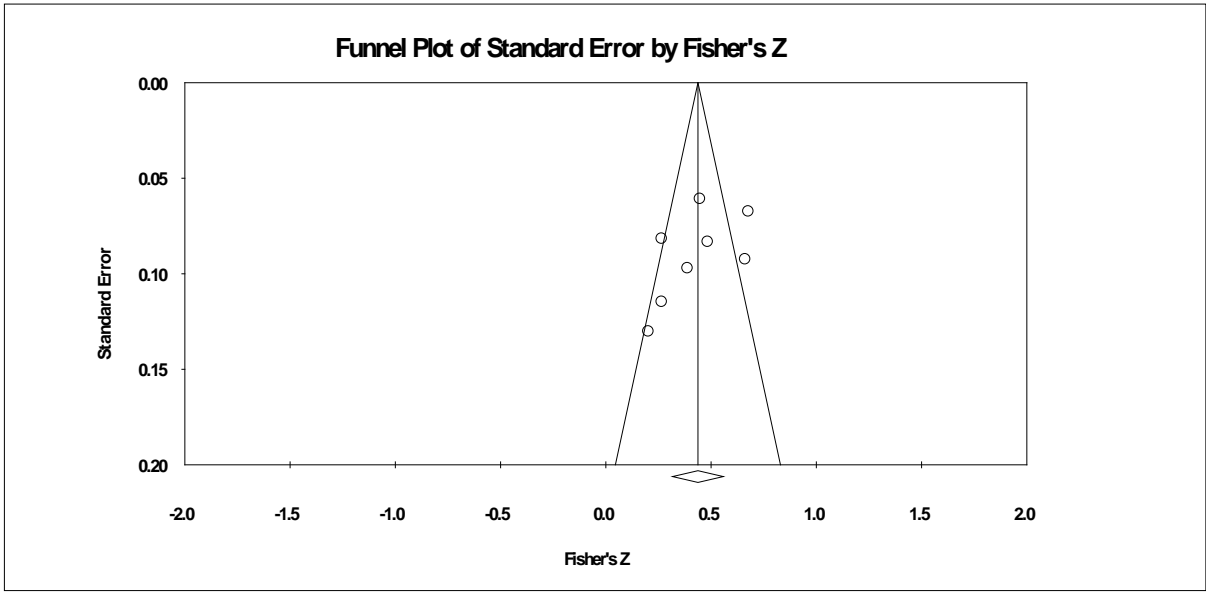

Supplementary Figure 17. Funnel plot of effect sizes for the SE-Behaviour relationship

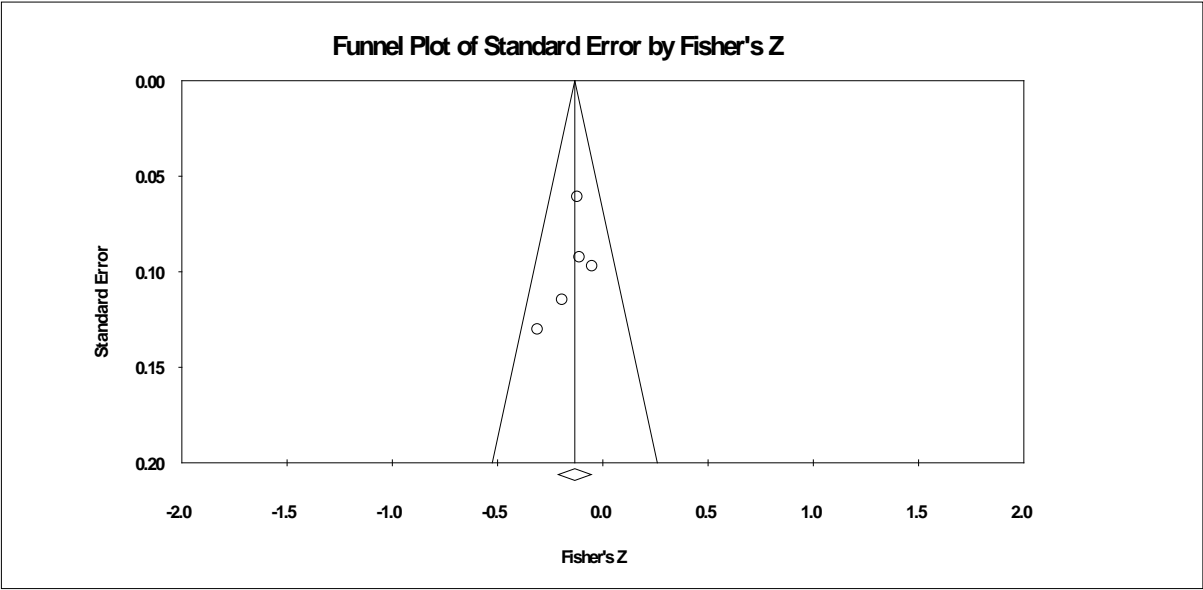

Supplementary Figure 18. Funnel plot of effect sizes for the PC-Behaviour relationship
